# Supplementary material for: Plant Functional Dispersion, Vulnerability and Originality Increase Arthropod Functions from a Protected Mountain Mediterranean Area in Spring
Source: MDPI journal article supplement (doi:10.3390/plants12040889), 2023-02-16
Supplement: s1 [file s1]

## Percentage of ground cover by plant family

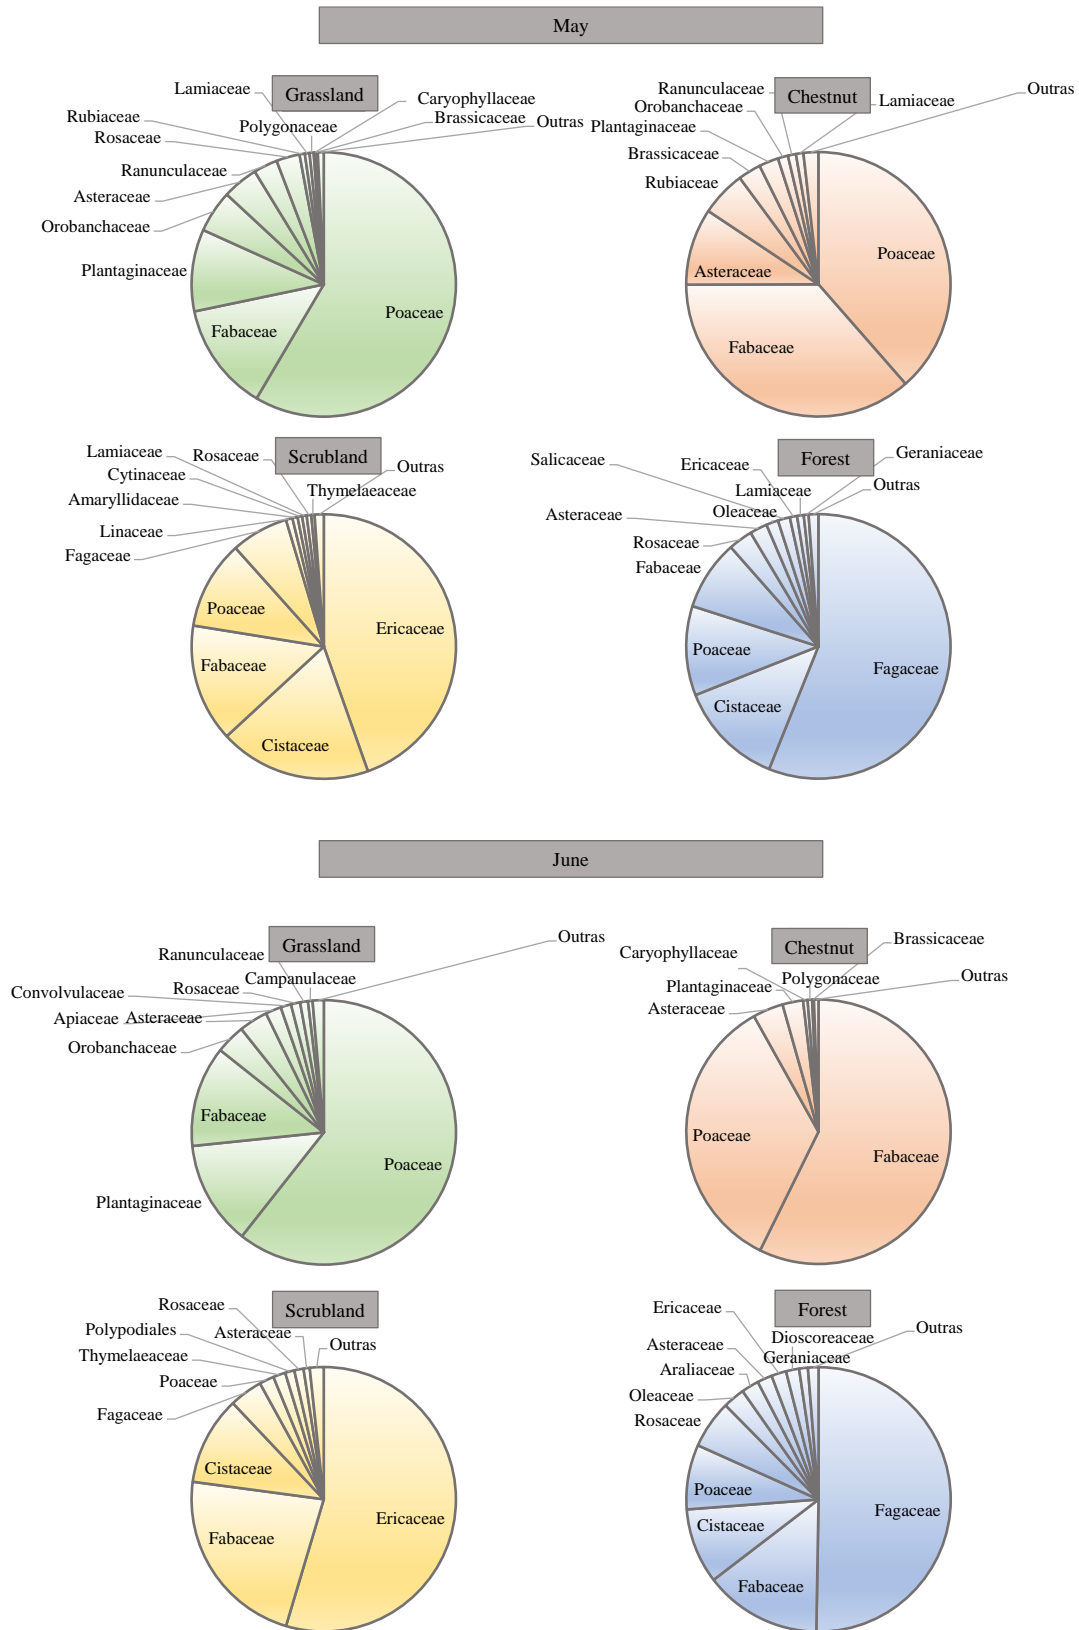

Figure S1. Percentage of ground cover by plant family per habitat and month
