# Supplementary material for: Plant Functional Dispersion, Vulnerability and Originality Increase Arthropod Functions from a Protected Mountain Mediterranean Area in Spring
Source: MDPI journal article supplement (doi:10.3390/plants12040889), 2023-02-16
Supplement: s1 [file s1]

Relation between traits and PCoA axes

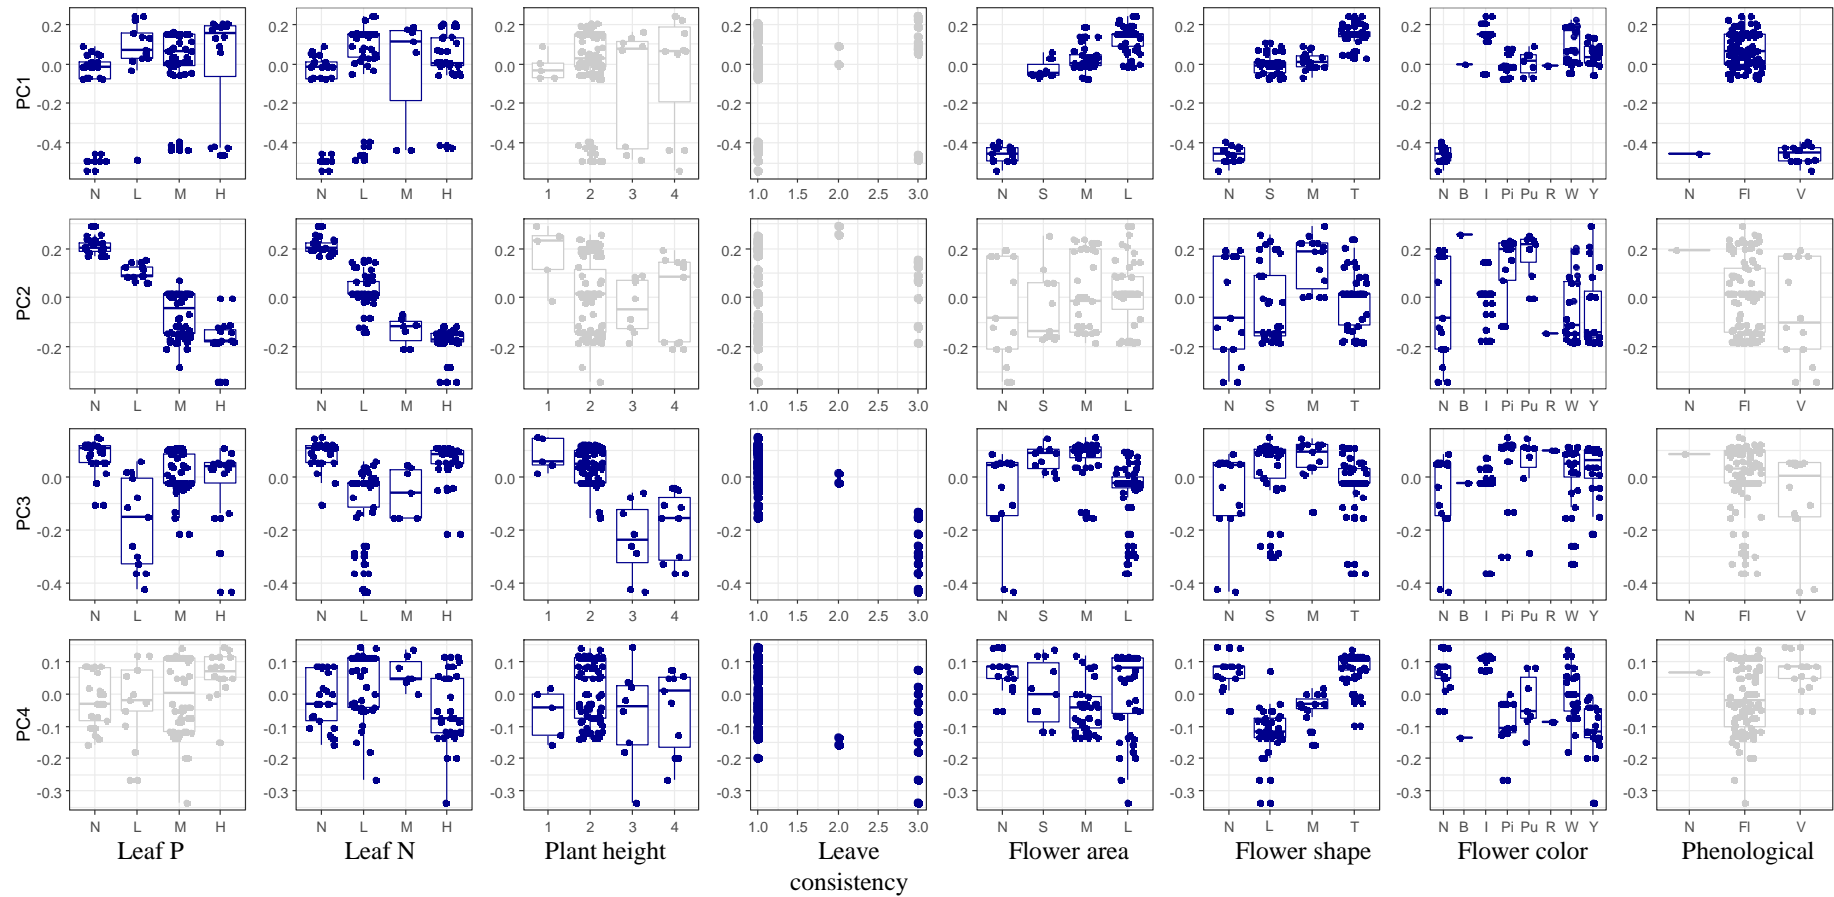

Figure S2. Relation between traits and PCoA axes in May. The significant traits are shown in blue. Leaf P – N: none, L: low, M: medium, H: high. Leaf N – N: none, L: low, M: medium, H: high. Inflorescence area – N: none, S: small, M: medium, L: large. Flower shape: N: none, L: low, M: medium, T: total. Flower color – N: none, B: brown, I: inconspicuous, Pi: Pink, Pu: Purple, R: Red, W: white, Y: Yellow. Phenological: None: none, Fl: Flower, V: vegetative.
