# Supplementary material for: Plant Functional Dispersion, Vulnerability and Originality Increase Arthropod Functions from a Protected Mountain Mediterranean Area in Spring
Source: MDPI journal article supplement (doi:10.3390/plants12040889), 2023-02-16
Supplement: s1 [file s1]

Table S1. Percentage of ground cover by plant species per habitat and month

| Family         | Species                                          | May      |           |           |        | June     |           |           |        |
|----------------|--------------------------------------------------|----------|-----------|-----------|--------|----------|-----------|-----------|--------|
|                |                                                  | Chestnut | Grassland | Scrubland | Forest | Chestnut | Grassland | Scrubland | Forest |
| Amaryllidaceae | <i>Allium sphaerocephalon</i> L.                 | 0        | 0         | 1.11      | 0      | 0        | 0.32      | 0         | 0.38   |
| Apiaceae       | <i>Achillea millefolium</i> L.                   | 0        | 0         | 0         | 0      | 0        | 2.56      | 0         | 0      |
|                | <i>Carum verticillatum</i> (L.) W.D.J.Koch       | 0        | 0.35      | 0         | 0      | 0        | 0         | 0         | 0      |
|                | <i>Galium lucidum</i> subsp. <i>lucidum</i> All. | 0        | 0         | 0         | 0      | 0        | 0         | 0         | 0.38   |
|                | <i>Torilis arvensis</i> (Huds.) Link             | 0        | 0         | 0         | 1.36   | 0        | 0         | 0         | 0      |
| Araliaceae     | <i>Hedera helix</i> sl                           | 0        | 0         | 0.42      | 0      | 0        | 0         | 0.98      | 7.51   |
| Asparagaceae   | <i>Muscari comosum</i> (L.) Mill.                | 0.24     | 0         | 0         | 0      | 0        | 0         | 0         | 0      |
| Asteraceae     | <i>Andryala integrifolia</i> L.                  | 0        | 0         | 0         | 0      | 0.33     | 0         | 1.47      | 0.38   |
|                | <i>Anthemis arvensis</i> L.                      | 2.83     | 2.07      | 0.42      | 0      | 1.25     | 0.64      | 0         | 0      |
|                | <i>Bellis perennis</i> L.                        | 1.00     | 0.35      | 0         | 0      | 0.50     | 0         | 0         | 0      |
|                | <i>Chondrilla juncea</i> L.                      | 0        | 0         | 0         | 0      | 0.50     | 0         | 0         | 0      |
|                | <i>Crepis capillaris</i> (L.) Wallr.             | 0        | 0         | 0         | 0      | 0.33     | 0         | 0         | 0      |
|                | <i>Crepis vesicaria</i> L.                       | 0.24     | 0         | 0         | 1.36   | 0        | 0         | 0         | 0      |
|                | <i>Filago vulgaris</i> Lam.                      | 0        | 0         | 0         | 0      | 0.55     | 0         | 0         | 0      |
|                | <i>Galactites tomentosus</i> Moench              | 0        | 0         | 0         | 2.72   | 0        | 0         | 0         | 2.25   |
|                | <i>Hedypnois cretica</i> (L.) Dum.-Courset       | 1.20     | 0         | 0         | 0      | 0        | 0         | 0         | 0      |
|                | <i>Hypochaeris radicata</i> L.                   | 0        | 1.24      | 0         | 0.27   | 0.33     | 0.93      | 0         | 0.38   |
|                | <i>Leontodon taraxacoides</i> (Vill.) Mérat      | 0.24     | 0         | 0         | 0      | 0        | 0         | 0         | 0      |
|                | <i>Logfia gallica</i> (L.) Coss. & Germ.         | 0        | 0         | 0         | 0.27   | 0        | 0         | 0         | 0      |
|                | <i>Senecio vulgaris</i> L.                       | 0        | 0         | 0         | 0      | 0.33     | 0         | 0         | 0      |
|                | <i>Tolpis barbata</i> (L.) Gaertn                | 0        | 0         | 0         | 0      | 0        | 0         | 0.98      | 0      |
| Boraginaceae   | <i>Echium plantagineum</i> L.                    | 0        | 0         | 0         | 0      | 0        | 0.32      | 0         | 0      |
|                | <i>Myosotis discolor</i> Pers.                   | 0.24     | 0.35      | 0         | 0      | 0        | 0         | 0         | 0      |
| Brassicaceae   | <i>Bunias erucago</i> L.                         | 3.82     | 0         | 0         | 0      | 0.66     | 0         | 0         | 0      |
|                | <i>Capsella bursa-pastoris</i> (L.) Medik.       | 0.24     | 0         | 0         | 0      | 0        | 0         | 0         | 0      |

| Family          | Species                                                          | May      |           |           |        | June     |           |           |        |
|-----------------|------------------------------------------------------------------|----------|-----------|-----------|--------|----------|-----------|-----------|--------|
|                 |                                                                  | Chestnut | Grassland | Scrubland | Forest | Chestnut | Grassland | Scrubland | Forest |
| Campanulaceae   | <i>Lepidium heterophyllum</i> Benth.                             | 0        | 0.52      | 0         | 0      | 0        | 0.32      | 0         | 0      |
|                 | <i>Raphanus raphanistrum</i> L.                                  | 0        | 0         | 0         | 0      | 0        | 0.64      | 0         | 0      |
|                 | <i>Campanula rapunculus</i> L.                                   | 0        | 0         | 0         | 0      | 0        | 0         | 0.73      | 0      |
|                 | <i>Jasione montana</i> L.                                        | 0        | 0         | 0         | 0.27   | 0        | 0         | 0.49      | 0.38   |
|                 | <i>Linum bienne</i> Mill.                                        | 0        | 0         | 0         | 0      | 0        | 0.56      | 0         | 0      |
| Caryophyllaceae | <i>Arenaria montana</i> subsp. <i>montana</i> L.                 | 0        | 0         | 0         | 0.27   | 0        | 0         | 0         | 0.38   |
|                 | <i>Cerastium brachypetalum</i> Desp. ex Pers.                    | 0.24     | 0.35      | 0         | 0      | 0.33     | 0.32      | 0         | 0      |
|                 | <i>Petrorhagia nanteuilii</i> (Burnat) P.W.Ball & Heywood        | 0        | 0         | 0         | 0      | 0.44     | 0         | 0         | 0      |
|                 | <i>Stellaria media</i> (L.) Vill.                                | 0.24     | 0.35      | 0         | 0      | 0        | 0         | 0         | 0      |
|                 | <i>Cistus ladanifer</i> L.                                       | 0        | 0         | 7.27      | 4.08   | 0        | 0         | 3.26      | 4.50   |
| Cistaceae       | <i>Cistus psilosepalus</i> Sweet                                 | 0        | 0         | 0         | 0      | 0        | 0         | 0         | 2.50   |
|                 | <i>Cistus salviifolius</i> L.                                    | 0        | 0         | 0         | 2.38   | 0        | 0         | 5.38      | 0      |
|                 | <i>Halimium lasianthum</i> subsp. <i>lasianthum</i> (Lam.) Spach | 0        | 0         | 6.64      | 1.03   | 0        | 0         | 3.24      | 1.13   |
|                 | <i>Helianthemum aegyptiacum</i> (L.) Mill.                       | 0        | 0         | 0         | 1.69   | 0        | 0         | 0         | 0      |
|                 | <i>Convolvulus arvensis</i> L.                                   | 0        | 0         | 0         | 0      | 0.66     | 1.71      | 0         | 0      |
| Convolvulaceae  | <i>Sedum forsterianum</i> Sm.                                    | 0        | 0         | 0         | 0      | 0        | 0         | 0         | 0.38   |
| Crassulaceae    | <i>Umbilicus rupestris</i> (Salisb.) Dandy                       | 0        | 0         | 0         | 0      | 0        | 0         | 0         | 0.38   |
| Cytinaceae      | <i>Cytinus hypocistis</i> (L.) L.                                | 0        | 0         | 0.97      | 0      | 0        | 0         | 0.49      | 0      |
| Dioscoreaceae   | <i>Tamus communis</i> L.                                         | 0        | 0         | 0         | 0      | 0        | 0         | 0         | 2.82   |
| Ericaceae       | <i>Erica arborea</i> L.                                          | 0        | 0         | 0         | 1.09   | 0        | 0         | 0         | 0      |
|                 | <i>Erica australis</i> L.                                        | 0        | 0         | 25.84     | 0      | 0        | 0         | 28.26     | 3.19   |
|                 | <i>Erica umbellata</i> L.                                        | 0        | 0         | 0         | 0      | 0        | 0         | 4.89      | 0      |
| Fabaceae        | <i>Coronilla repanda</i> (Poir.) Guss.                           | 0        | 0         | 0         | 0.27   | 0        | 0.64      | 0         | 0.75   |
|                 | <i>Cytisus multiflorus</i> (L'Hér.) Sweet                        | 0        | 0         | 2.35      | 1.52   | 0        | 0         | 6.72      | 4.22   |

| Family | Species                                                    | May      |           |           |        | June     |           |           |        |
|--------|------------------------------------------------------------|----------|-----------|-----------|--------|----------|-----------|-----------|--------|
|        |                                                            | Chestnut | Grassland | Scrubland | Forest | Chestnut | Grassland | Scrubland | Forest |
|        | <i>Cytisus scoparius</i> subsp. <i>scoparius</i> (L.) Link | 0        | 0         | 1.11      | 2.72   | 0        | 0         | 6.11      | 0      |
|        | <i>Cytisus</i> sp                                          | 0        | 0         | 0         | 0      | 0        | 0         | 0         | 6.57   |
|        | <i>Cytisus striatus</i> (Hill) Rothm.                      | 0        | 0         | 0         | 0      | 0        | 0         | 0         | 3.75   |
|        | <i>Genista florida</i> L.                                  | 0        | 0         | 0         | 4.76   | 0        | 0         | 0         | 3.75   |
|        | <i>Genista hystrix</i> Lange                               | 0        | 0         | 0         | 0      | 0        | 0         | 0.98      | 4.69   |
|        | <i>Lathyrus cicera</i> L.                                  | 0.72     | 0         | 0.42      | 0      | 0.33     | 0         | 0         | 0      |
|        | <i>Lotus corniculatus</i> L.                               | 0.67     | 0         | 0         | 0.38   | 1.66     | 0         | 0.49      | 0.38   |
|        | <i>Lotus pedunculatus</i> Cav.                             | 0        | 0         | 0         | 0      | 0.33     | 0         | 0         | 0      |
|        | <i>Medicago polymorpha</i> L.                              | 1.20     | 0         | 0         | 0      | 0.33     | 0         | 0         | 0      |
|        | <i>Ononis spinosa</i> L.                                   | 0        | 0         | 0         | 0      | 0.33     | 0         | 0         | 0      |
|        | <i>Ornithopus compressus</i> L.                            | 0.68     | 0         | 0         | 0.27   | 1.22     | 0.32      | 0         | 0      |
|        | <i>Ornithopus perpusillus</i> L.                           | 0.72     | 0         | 0         | 0.27   | 1.00     | 0.32      | 0         | 0.38   |
|        | <i>Pterospartum tridentatum</i> (L.) Willk.                | 0        | 0         | 7.01      | 0      | 0        | 0         | 8.37      | 0      |
|        | <i>Trifolium arvense</i> L.                                | 0        | 0         | 0         | 0      | 0        | 0         | 0.49      | 0      |
|        | <i>Trifolium campestre</i> Schreb.                         | 1.20     | 0         | 0.42      | 0      | 0.66     | 0.32      | 0         | 0.38   |
|        | <i>Trifolium cernuum</i> Brot.                             | 0        | 0         | 0         | 0      | 0.33     | 1.60      | 0         | 0      |
|        | <i>Trifolium dubium</i> Sibth.                             | 0.24     | 2.35      | 0         | 0      | 0        | 0         | 0         | 0      |
|        | <i>Trifolium glomeratum</i> L.                             | 7.17     | 0         | 0         | 0      | 1.00     | 0         | 0.49      | 0      |
|        | <i>Trifolium incarnatum</i> L.                             | 1.20     | 1.73      | 0         | 0      | 0        | 0.64      | 0         | 0      |
|        | <i>Trifolium pratense</i> L.                               | 5.96     | 0.35      | 0         | 0      | 3.49     | 1.46      | 0         | 0      |
|        | <i>Trifolium repens</i> L.                                 | 6.57     | 4.68      | 0         | 0      | 16.61    | 2.96      | 0         | 0      |
|        | <i>Trifolium resupinatum</i> L.                            | 0.24     | 0         | 0         | 0      | 0.66     | 1.76      | 0         | 0      |
|        | <i>Trifolium stellatum</i> L.                              | 0        | 0         | 0         | 0      | 16.61    | 0         | 0         | 0      |
|        | <i>Trifolium striatum</i> L.                               | 0        | 0         | 0         | 0      | 0        | 0.85      | 0         | 0      |
|        | <i>Trifolium strictum</i> L.                               | 0        | 0.92      | 0         | 0      | 0        | 0         | 0         | 0      |
|        | <i>Trifolium subterraneum</i> L.                           | 10.16    | 0         | 0         | 0      | 0        | 0         | 0         | 0      |

| Family         | Species                                     | May      |           |           |        | June     |           |           |        |
|----------------|---------------------------------------------|----------|-----------|-----------|--------|----------|-----------|-----------|--------|
|                |                                             | Chestnut | Grassland | Scrubland | Forest | Chestnut | Grassland | Scrubland | Forest |
| Fagaceae       | <i>Trifolium vesiculosum</i> Savi           | 0        | 0         | 0         | 0      | 1.66     | 0         | 0         | 0      |
|                | <i>Vicia angustifolia</i> L.                | 0.24     | 0.78      | 0.42      | 0.27   | 0.50     | 0.32      | 0         | 0.38   |
|                | <i>Vicia hirsuta</i> (L.) Gray              | 2.51     | 0         | 0         | 0      | 0.33     | 0         | 0         | 0      |
|                | <i>Vicia lutea</i> L.                       | 0.24     | 0         | 0         | 0      | 0        | 0         | 0         | 0      |
|                | <i>Vicia villosa</i> Roth                   | 0        | 0         | 0         | 0      | 0        | 0.32      | 0         | 0      |
|                | <i>Quercus pyrenaica</i> Willd.             | 0        | 0         | 3.03      | 0      | 0        | 0         | 1.41      | 0      |
|                | <i>Quercus rotundifolia</i> Lam.            | 0        | 0         | 3.07      | 17.24  | 0        | 0         | 3.26      | 14.70  |
| Geraniaceae    | <i>Erodium cicutarium</i> (L.) L'Hér.       | 0        | 0.35      | 0         | 0      | 0        | 0.64      | 0         | 0      |
|                | <i>Erodium</i> sp.                          | 0.24     | 0         | 0         | 0      | 0        | 0         | 0         | 0      |
|                | <i>Geranium dissectum</i> L.                | 0        | 0.35      | 0         | 0      | 0        | 0.32      | 0         | 0      |
|                | <i>Geranium lucidum</i> L.                  | 0        | 0         | 0         | 0      | 0        | 0         | 0         | 0.56   |
|                | <i>Geranium molle</i> L.                    | 0.24     | 0         | 0.42      | 0.73   | 0        | 0         | 0         | 0      |
|                | <i>Geranium robertianum</i> L.              | 0        | 0         | 0         | 0      | 0        | 0         | 0         | 1.31   |
|                | <i>Hypericum perforatum</i> L.              | 0.24     | 0         | 0.83      | 0      | 0.66     | 0.32      | 2.45      | 0      |
| Lamiaceae      | <i>Acinos alpinus</i> (L.) Moench           | 0        | 1.04      | 0         | 0      | 0        | 0         | 0         | 0      |
|                | <i>Clinopodium vulgare</i> L.               | 0        | 0         | 0         | 0      | 0.33     | 0         | 0.49      | 0      |
|                | <i>Lavandula pedunculata</i> (Mill.) Cav.   | 0        | 0         | 2.08      | 1.00   | 0        | 0         | 0.49      | 1.88   |
|                | <i>Mentha suaveolens</i> Ehrh.              | 0        | 0.35      | 0         | 0      | 0        | 0.32      | 0         | 0      |
|                | <i>Stachys arvensis</i> (L.) L.             | 1.31     | 0         | 0         | 0      | 0        | 0         | 0         | 0      |
|                | <i>Thymus mastichina</i> L.                 | 0        | 0         | 0.83      | 0      | 0        | 0         | 0.98      | 0.38   |
|                | <i>Linum bienne</i> Mill.                   | 0        | 0.35      | 4.15      | 0      | 0        | 0         | 0         | 0      |
| Oleaceae       | <i>Fraxinus angustifolia</i> Vahl           | 0        | 0         | 0.42      | 5.44   | 0        | 0         | 0.98      | 4.69   |
| Orchidaceae    | <i>Serapias lingua</i> L.                   | 0        | 0.35      | 0         | 0      | 0        | 0         | 0         | 0      |
| Orobanchaceae  | <i>Orobanche rapum-genistae</i> Thuill.     | 0        | 0         | 0.42      | 0      | 0        | 0         | 0.49      | 0      |
|                | <i>Parentucellia latifolia</i> (L.) Caruel  | 1.79     | 0         | 0         | 0      | 0        | 0         | 0         | 0      |
|                | <i>Rhinanthus minor</i> L.                  | 0        | 4.98      | 0         | 0      | 0        | 4.80      | 0         | 0      |
| Plantaginaceae | <i>Anarrhinum bellidifolium</i> (L.) Willd. | 0.24     | 0         | 0         | 0      | 0.33     | 0         | 0.49      | 0      |

| Family  | Species                                                      | May      |           |           |        | June     |           |           |        |
|---------|--------------------------------------------------------------|----------|-----------|-----------|--------|----------|-----------|-----------|--------|
|         |                                                              | Chestnut | Grassland | Scrubland | Forest | Chestnut | Grassland | Scrubland | Forest |
| Poaceae | <i>Digitalis purpurea</i> L.                                 | 0        | 0         | 0         | 0      | 0        | 0.32      | 0         | 0      |
|         | <i>Plantago lanceolata</i> L.                                | 1.34     | 4.84      | 0         | 0      | 1.83     | 4.19      | 0         | 0      |
|         | <i>Reseda luteola</i> L.                                     | 0        | 0         | 0         | 0      | 0        | 0.32      | 0         | 0      |
|         | <i>Aegilops triuncialis</i> L.                               | 0        | 0         | 0         | 0      | 6.65     | 0         | 0         | 0      |
|         | <i>Agrostis castellana</i> Boiss. & Reut.                    | 0        | 0         | 0         | 0      | 0.33     | 11.74     | 0         | 0      |
|         | <i>Anthoxanthum amarum</i> Brot.                             | 5.98     | 0.35      | 0         | 5.44   | 6.65     | 5.87      | 0         | 3.75   |
|         | <i>Anthoxanthum aristatum</i> subsp. <i>aristatum</i> Boiss. | 0        | 0         | 0         | 13.61  | 0        | 2.13      | 0         | 0      |
|         | <i>Anthoxanthum odoratum</i> L.                              | 0        | 0.81      | 0         | 0      | 0        | 0         | 0         | 0      |
|         | <i>Arrhenatherum elatius</i> (L.) J.Presl & C.Presl          | 4.78     | 0.46      | 1.25      | 0      | 2.99     | 4.80      | 0         | 3.57   |
|         | <i>Avena barbata</i> Link                                    | 1.20     | 1.50      | 0         | 0.27   | 0.50     | 1.60      | 0         | 7.51   |
|         | <i>Avenula sulcata</i> (Boiss.) Dumort.                      | 0        | 2.59      | 0         | 5.44   | 0        | 0         | 0         | 0      |
|         | <i>Briza maxima</i> L.                                       | 0        | 0         | 0         | 0      | 0        | 0         | 0.98      | 0      |
|         | <i>Briza minor</i> L.                                        | 0        | 0.35      | 0         | 0      | 0        | 0.32      | 0         | 0      |
|         | <i>Bromus diandrus</i> Roth                                  | 1.79     | 8.64      | 0         | 4.76   | 1.66     | 6.40      | 0         | 0      |
|         | <i>Bromus hordeaceus</i> L.                                  | 0.88     | 3.55      | 0         | 0      | 1.33     | 0.43      | 0         | 0      |
|         | <i>Bromus madritensis</i> L.                                 | 0        | 5.36      | 0         | 0      | 3.32     | 5.55      | 0         | 0      |
|         | <i>Bromus</i> sp                                             | 3.59     | 0         | 15.23     | 1.50   | 0        | 0         | 0         | 0      |
|         | <i>Bromus sterilis</i> L.                                    | 2.99     | 0         | 0         | 0      | 0        | 0         | 0         | 0      |
|         | <i>Bromus tectorum</i> L.                                    | 2.99     | 4.32      | 0         | 0      | 0        | 0         | 0         | 0      |
|         | <i>Cynosurus cristatus</i> L.                                | 0        | 4.56      | 0         | 0      | 4.54     | 3.73      | 0         | 0      |
|         | <i>Cynosurus echinatus</i> L.                                | 2.39     | 0         | 0         | 0      | 0.50     | 0         | 0         | 0.75   |
|         | <i>Dactylis glomerata</i> L.                                 | 0.84     | 1.73      | 4.15      | 0.82   | 0.80     | 0.48      | 2.77      | 0.75   |
|         | <i>Festuca arundinacea</i> Schreb.                           | 0        | 0         | 0         | 0      | 0.33     | 4.00      | 0         | 0      |
|         | <i>Holcus lanatus</i> L.                                     | 0.48     | 5.67      | 0         | 0      | 0.66     | 8.00      | 0         | 0      |
|         | <i>Hordeum murinum</i> L.                                    | 0        | 0         | 0         | 0      | 0.66     | 0         | 0         | 0      |

| Family       | Species                                                                 | May      |           |           |        | June     |           |           |        |
|--------------|-------------------------------------------------------------------------|----------|-----------|-----------|--------|----------|-----------|-----------|--------|
|              |                                                                         | Chestnut | Grassland | Scrubland | Forest | Chestnut | Grassland | Scrubland | Forest |
| Polygalaceae | <i>Lolium rigidum</i> subsp. <i>rigidum</i> Gaudin                      | 4.01     | 1.61      | 0         | 0      | 3.54     | 6.19      | 0         | 0      |
|              | <i>Molineriella laevis</i> (Brot.) Rouy                                 | 0.84     | 0         | 4.15      | 0      | 0        | 0         | 0         | 0      |
|              | Poaceae                                                                 | 0        | 17.28     | 0         | 0      | 0.60     | 0         | 0         | 0      |
|              | <i>Trisetaria</i> <i>flavescens</i> subsp. <i>flavescens</i> (L.) Maire | 0        | 0         | 0         | 0      | 0        | 3.20      | 0         | 0      |
|              | <i>Vulpia</i> sp.                                                       | 5.68     | 3.46      | 0         | 1.36   | 6.65     | 1.12      | 0         | 0      |
|              | <i>Polygala microphylla</i> L.                                          | 0        | 0         | 0         | 0      | 0        | 0         | 0.49      | 0      |
|              | <i>Polygala vulgaris</i> L.                                             | 0        | 0         | 0.42      | 0      | 0        | 0         | 0         | 0      |
|              | <i>Rumex acetosa</i> subsp. <i>acetosa</i> L.                           | 0        | 0.69      | 0         | 0      | 0        | 0         | 0         | 0      |
|              | <i>Rumex acetosella</i> subsp. <i>angiocarpus</i> (Murb.) Murb.         | 0        | 1.73      | 0         | 0      | 0.66     | 0.64      | 0         | 0      |
|              | <i>Rumex bucephalophorus</i> L.                                         | 0.29     | 0         | 0         | 0      | 0        | 0         | 0         | 0      |
|              | <i>Rumex conglomeratus</i> Murray                                       | 0.24     | 0         | 0         | 0      | 0.50     | 0         | 0         | 0.38   |
|              | Polypodiales                                                            | 0        | 0         | 0         | 0      | 0        | 0         | 1.96      | 0      |
|              | <i>Pteridium aquilinum</i> subsp. <i>aquilinum</i>                      | 0        | 0         | 0.42      | 0      | 0        | 0         | 0         | 0      |
|              | Ranunculaceae                                                           | 0.96     | 1.57      | 0         | 0      | 0.33     | 0.96      | 0         | 0      |
| Resedaceae   | <i>Reseda luteola</i> L.                                                | 0        | 0.52      | 0         | 0.27   | 0        | 0         | 0         | 0      |
|              | <i>Sesamoides purpurascens</i> (L.) G.López                             | 0.24     | 0         | 0         | 0      | 0        | 0         | 0         | 0      |
| Rosaceae     | <i>Rosa</i> sp.                                                         | 0        | 0         | 1.45      | 2.72   | 0        | 0         | 4.89      | 6.88   |
|              | <i>Rubus ulmifolius</i> var. <i>ulmifolius</i> Schott                   | 0        | 0         | 0         | 5.44   | 0        | 0         | 0         | 0      |
| Rubiaceae    | <i>Sanguisorba verrucosa</i> (Link ex G.Don) Ces.                       | 0        | 2.76      | 0         | 0      | 0.33     | 1.12      | 0.98      | 0      |
|              | <i>Galium aparine</i> L.                                                | 0        | 0         | 0         | 0.95   | 0        | 0         | 0         | 0      |
|              | <i>Galium lucidum</i> subsp. <i>lucidum</i> All.                        | 0        | 0         | 0         | 0      | 0        | 0         | 0         | 0.75   |
|              | <i>Galium parisiense</i> L.                                             | 0        | 1.04      | 0.83      | 0      | 0        | 0         | 0         | 0      |

| Family           | Species                                    | May      |           |           |        | June     |           |           |        |
|------------------|--------------------------------------------|----------|-----------|-----------|--------|----------|-----------|-----------|--------|
|                  |                                            | Chestnut | Grassland | Scrubland | Forest | Chestnut | Grassland | Scrubland | Forest |
|                  | <i>Galium verum</i> subsp. <i>verum</i> L. | 0        | 0         | 0         | 0      | 0        | 0.64      | 0         | 0      |
|                  | <i>Sherardia arvensis</i> L.               | 4.00     | 0.52      | 0         | 0      | 0        | 0         | 0         | 0      |
| Salicaceae       | <i>Populus nigra</i> L.                    | 0        | 0         | 0         | 5.44   | 0        | 0         | 0         | 0      |
| Saxifragaceae    | <i>Saxifraga granulata</i> L.              | 0.24     | 0         | 0         | 0      | 0        | 0         | 0         | 0      |
| Thymelaeaceae    | <i>Daphne gnidium</i> L.                   | 0        | 0         | 2.08      | 0.27   | 0        | 0         | 2.61      | 0      |
| Xanthorrhoeaceae | <i>Simethis mattiazzi</i> (Vand.) Sacc.    | 0        | 0         | 0.42      | 0      | 0        | 0         | 0.49      | 0      |
