# Supplementary material for: Plant Functional Dispersion, Vulnerability and Originality Increase Arthropod Functions from a Protected Mountain Mediterranean Area in Spring
Source: MDPI journal article supplement (doi:10.3390/plants12040889), 2023-02-16
Supplement: s1 [file s1]

Table S2. Relation between traits and PCoA axes: trait, principal component (PC), test, statistic name, statistic value and p-value

| May                |      |                |           |       |         | June               |      |                |           |       |         |
|--------------------|------|----------------|-----------|-------|---------|--------------------|------|----------------|-----------|-------|---------|
| trait              | axis | test           | statistic | value | p-value | trait              | axis | test           | statistic | value | p-value |
| leaf P             | PC1  | Kruskal-Wallis | eta2      | 0.202 | < 0.001 | leaf P             | PC2  | Kruskal-Wallis | eta2      | 0.690 | < 0.001 |
| leaf P             | PC2  | Kruskal-Wallis | eta2      | 0.749 | < 0.001 | leaf P             | PC3  | Kruskal-Wallis | eta2      | 0.429 | < 0.001 |
| leaf P             | PC3  | Kruskal-Wallis | eta2      | 0.330 | < 0.001 | leaf N             | PC1  | Kruskal-Wallis | eta2      | 0.151 | < 0.001 |
| leaf P             | PC4  | Kruskal-Wallis | eta2      | 0.104 | 0.003   | leaf N             | PC2  | Kruskal-Wallis | eta2      | 0.883 | < 0.001 |
| leaf N             | PC1  | Kruskal-Wallis | eta2      | 0.178 | < 0.001 | leaf N             | PC3  | Kruskal-Wallis | eta2      | 0.547 | < 0.001 |
| leaf N             | PC2  | Kruskal-Wallis | eta2      | 0.868 | < 0.001 | leaf N             | PC4  | Kruskal-Wallis | eta2      | 0.067 | 0.016   |
| leaf N             | PC3  | Kruskal-Wallis | eta2      | 0.520 | < 0.001 | Plant height       | PC1  | Kruskal-Wallis | eta2      | 0.048 | 0.042   |
| leaf N             | PC4  | Kruskal-Wallis | eta2      | 0.119 | 0.001   | Plant height       | PC3  | Kruskal-Wallis | eta2      | 0.452 | < 0.001 |
| Plant height       | PC3  | Kruskal-Wallis | eta2      | 0.386 | < 0.001 | Plant height       | PC4  | Kruskal-Wallis | eta2      | 0.095 | 0.004   |
| Leave consistency  | PC3  | Linear Model   | r2        | 0.704 | < 0.001 | Leave consistency  | PC3  | Linear Model   | r2        | 0.546 | < 0.001 |
| Inflorescence area | PC1  | Kruskal-Wallis | eta2      | 0.663 | < 0.001 | Leave consistency  | PC4  | Linear Model   | r2        | 0.134 | < 0.001 |
| Inflorescence area | PC3  | Kruskal-Wallis | eta2      | 0.409 | < 0.001 | Inflorescence area | PC1  | Kruskal-Wallis | eta2      | 0.803 | < 0.001 |
| Inflorescence area | PC4  | Kruskal-Wallis | eta2      | 0.049 | 0.043   | Inflorescence area | PC3  | Kruskal-Wallis | eta2      | 0.235 | < 0.001 |
| Flower shape       | PC1  | Kruskal-Wallis | eta2      | 0.717 | < 0.001 | Inflorescence area | PC4  | Kruskal-Wallis | eta2      | 0.256 | < 0.001 |
| Flower shape       | PC2  | Kruskal-Wallis | eta2      | 0.123 | 0.001   | Flower shape       | PC1  | Kruskal-Wallis | eta2      | 0.882 | < 0.001 |
| Flower shape       | PC3  | Kruskal-Wallis | eta2      | 0.114 | 0.002   | Flower shape       | PC2  | Kruskal-Wallis | eta2      | 0.175 | < 0.001 |
| Flower shape       | PC4  | Kruskal-Wallis | eta2      | 0.491 | < 0.001 | Flower shape       | PC3  | Kruskal-Wallis | eta2      | 0.095 | 0.004   |
| Flower color       | PC1  | Kruskal-Wallis | eta2      | 0.406 | < 0.001 | Flower shape       | PC4  | Kruskal-Wallis | eta2      | 0.608 | < 0.001 |
| Flower color       | PC2  | Kruskal-Wallis | eta2      | 0.178 | 0.001   | Flower color       | PC1  | Kruskal-Wallis | eta2      | 0.735 | < 0.001 |
| Flower color       | PC3  | Kruskal-Wallis | eta2      | 0.104 | 0.010   | Flower color       | PC3  | Kruskal-Wallis | eta2      | 0.114 | 0.008   |
| Flower color       | PC4  | Kruskal-Wallis | eta2      | 0.509 | < 0.001 | Flower color       | PC4  | Kruskal-Wallis | eta2      | 0.776 | < 0.001 |
| Phenological       | PC1  | Kruskal-Wallis | eta2      | 0.343 | < 0.001 | Phenological       | PC1  | Kruskal-Wallis | eta2      | 0.594 | < 0.001 |
