# Supplementary material for: Plant Functional Dispersion, Vulnerability and Originality Increase Arthropod Functions from a Protected Mountain Mediterranean Area in Spring
Source: MDPI journal article supplement (doi:10.3390/plants12040889), 2023-02-16
Supplement: s1 [file s1]

Table S4. The leaf nitrogen (leaf-N) and phosphorous (leaf-P) composition ( $\text{mg g}^{-1}$ ). Mean values – for species when possible, or for plant family – from the literature were used [1-5] [References 31 to 35 in reference list of the manuscript]. For species/families with no information “Not Available” (NA) was introduced in the data matrix. The values were ranked as follows: for N – low ( $< 19 \text{ mg g}^{-1}$ ), medium ( $> 19$  and  $< 23 \text{ mg g}^{-1}$ ), high ( $> 23 \text{ mg g}^{-1}$ ), for P – low ( $< 1.1 \text{ mg g}^{-1}$ ), medium ( $> 1.1$  and  $< 1.7 \text{ mg g}^{-1}$ ), high ( $> 1.7 \text{ mg g}^{-1}$ ).

| Family          | Species                                                          | leaf-N | leaf-P |
|-----------------|------------------------------------------------------------------|--------|--------|
| Amaranthaceae   | <i>Chenopodium</i> sp                                            | NA     | NA     |
| Amaryllidaceae  | <i>Allium sphaerocephalon</i> L.                                 | NA     | NA     |
| Apiaceae        | spp.                                                             | high   | high   |
| Araliaceae      | <i>Hedera helix</i> sl                                           | low    | high   |
| Asparagaceae    | <i>Muscari comosum</i> (L.) Mill.                                | low    | low    |
| Asteraceae      | spp.                                                             | low    | medium |
| Boraginaceae    | <i>Echium plantagineum</i> L.                                    | high   | high   |
|                 | <i>Myosotis discolor</i> Pers.                                   | NA     | NA     |
| Brassicaceae    | spp.                                                             | NA     | NA     |
| Campanulaceae   | spp.                                                             | NA     | NA     |
| Caryophyllaceae | spp.                                                             | medium | NA     |
| Cistaceae       | <i>Cistus ladanifer</i> L                                        | low    | low    |
|                 | <i>Cistus psilosepalus</i> Sweet                                 | low    | low    |
|                 | <i>Cistus salviifolius</i> L.                                    | medium | NA     |
|                 | <i>Halimium lasianthum</i> subsp. <i>lasianthum</i> (Lam.) Spach | low    | low    |
|                 | <i>Helianthemum aegyptiacum</i> (L.) Mill.                       | low    | low    |
| Convolvulaceae  | <i>Convolvulus arvensis</i> L.                                   | NA     | NA     |
| Crassulaceae    | spp.                                                             | NA     | NA     |
| Cytinaceae      | <i>Cytinus hypocistis</i> (L.) L.                                | NA     | NA     |
| Dioscoreaceae   | <i>Tamus communis</i> L.                                         | NA     | NA     |
| Ericaceae       | spp.                                                             | low    | low    |
| Euphorbiaceae   | <i>Euphorbia</i> sp.                                             | low    | medium |
| Fabaceae        | spp.                                                             | high   | medium |
| Fagaceae        | spp.                                                             | low    | low    |
| Geraniaceae     | spp.                                                             | NA     | NA     |
| Hypericaceae    | <i>Hypericum perforatum</i> L.                                   | NA     | NA     |
| Lamiaceae       | <i>Acinos alpinus</i> (L.) Moench                                | NA     | NA     |
|                 | <i>Clinopodium vulgare</i> L.                                    | low    | high   |
|                 | <i>Lavandula pedunculata</i> (Mill.) Cav.                        | low    | high   |
|                 | <i>Mentha suaveolens</i> Ehrh.                                   | NA     | NA     |
|                 | <i>Stachys arvensis</i> (L.) L.                                  | NA     | NA     |
|                 | <i>Thymus mastichina</i> L.                                      | low    | high   |
| Linaceae        | <i>Linum bienne</i> Mill.                                        | NA     | NA     |
| Lythraceae      | <i>Lythrum salicaria</i> L.                                      | NA     | NA     |
| Oleaceae        | <i>Fraxinus angustifolia</i> Vahl                                | medium | NA     |
| Orchidaceae     | <i>Serapias lingua</i> L.                                        | NA     | NA     |
| Orobanchaceae   | spp.                                                             | NA     | NA     |
| Plantaginaceae  | <i>Anarrhinum bellidifolium</i> (L.) Willd.                      | NA     | NA     |
|                 | <i>Digitalis purpurea</i> L.                                     | low    | low    |

| Family           | Species                                               | leaf-N | leaf-P |
|------------------|-------------------------------------------------------|--------|--------|
|                  | <i>Plantago lanceolata</i> L.                         | high   | medium |
| Poaceae          | spp.                                                  | low    | medium |
| Polygalaceae     | spp.                                                  | NA     | NA     |
| Polygonaceae     | spp.                                                  | high   | high   |
| Ranunculaceae    | <i>Ranunculus bulbosus</i> L.                         | high   | high   |
| Resedaceae       | spp.                                                  | high   | high   |
| Rosaceae         | <i>Crataegus monogyna</i> Jacq.                       | low    | low    |
|                  | <i>Prunus avium</i> L.                                | medium | NA     |
|                  | <i>Rosa</i> sp.                                       | low    | low    |
|                  | <i>Rubus</i> sp.                                      | medium | NA     |
|                  | <i>Rubus ulmifolius</i> var. <i>ulmifolius</i> Schott | medium | NA     |
|                  | <i>Sanguisorba verrucosa</i> (Link ex G.Don) Ces.     | medium | NA     |
| Rubiaceae        | spp.                                                  | low    | low    |
| Salicaceae       | <i>Populus nigra</i> L.                               | NA     | NA     |
| Saxifragaceae    | <i>Saxifraga granulata</i> L.                         | high   | high   |
| Thymelaeaceae    | <i>Daphne gnidium</i> L.                              | low    | low    |
| Ulmaceae         | <i>Ulmus minor</i> Mill.                              | high   | medium |
| Xanthorrhoeaceae | <i>Simethis mattiazzii</i> (Vand.) Sacc.              | high   | high   |

## References

1. Margaris, N.S.; Adamandiadou, S.; Siafaca, L.; Diamantopoulos, J. Nitrogen and phosphorus content in plant species of Mediterranean ecosystems in Greece. *Vegetatio*. **1984**, *55*, 29–35. <https://doi.org/10.1007/BF00039978>
2. Badre, B.; Nobelis, P.; Trémolières. Quantitative study and modelling of the litter decomposition in a European alluvial forest. Is there an influence of overstorey tree species on the decomposition of ivy litter (*Hedera helix* L.). *Acta Oecol.* **1998**, *19*, 491–500. [https://doi.org/10.1016/S1146-609X\(99\)80003-4](https://doi.org/10.1016/S1146-609X(99)80003-4)
3. Tian, D.; Yan, Z.; Ma, S.; Ding, Y.; Luo, Y.; Chen, Y.; Du, E.; Han, W.; Kovacs, D.E.; Shen, H.; Hu, H., Kattge, J.; Schmid, B.; Fang, J. Family-level leaf nitrogen and phosphorus stoichiometry of global terrestrial plants. *Sci. China Life Sci.* **2019**, *8*, 1047–1057. <https://doi.org/10.1007/s11427-019-9584-1>
4. Mohammadzadeh, S.; Pirzad, A. Biochemical responses of mycorrhizal-inoculated Lamiaceae (Lavender, Rosemary and Thyme) plants to drought: a field study. *J. Soil Sci. Plant Nutr.* **2021**, *67*, 41–49. <https://doi.org/10.1080/00380768.2020.1851144>
5. Navarro, T.; Hidalgo-Triana, N. Variations in leaf traits modulate plant vegetative and reproductive phenological sequencing across arid Mediterranean shrublands. *Front. Plant Sci.* **2021**, *12*, 708367. <https://doi.org/10.3389/fpls.2021.708367>
