# Supplementary material for: Plant Functional Dispersion, Vulnerability and Originality Increase Arthropod Functions from a Protected Mountain Mediterranean Area in Spring
Source: MDPI journal article supplement (doi:10.3390/plants12040889), 2023-02-16
Supplement: s1 [file s1]

**Table S3.** GLM and LM outputs for the estimated regression parameters and standard errors of the response of (i) taxonomic and (ii) functional plant diversity indexes to the habitat type (grassland, chestnut, scrubland, oak forest).

| (i) Taxonomic diversity                                             |          |        |           |         |                                                                  |          |       |           |         |
|---------------------------------------------------------------------|----------|--------|-----------|---------|------------------------------------------------------------------|----------|-------|-----------|---------|
| May                                                                 |          |        |           |         | June                                                             |          |       |           |         |
| Richness - Trich                                                    |          |        |           |         | Richness - Trich                                                 |          |       |           |         |
| Generalized Linear model: glm(Trich~Environment, Family ="poisson") |          |        |           |         | Generalized Linear model: glm.nb(Trich~Environment)              |          |       |           |         |
|                                                                     | Estimate | SE     | Statistic | p-value |                                                                  | Estimate | SE    | Statistic | p-value |
| Grassland                                                           | 2.944    | 0.178  | 16.539    | 0.000   | Grassland                                                        | 2.970    | 0.205 | 14.492    | 0.000   |
| Chestnut                                                            | 0.147    | 0.248  | 0.591     | 0.555   | Chestnut                                                         | 0.000    | 0.290 | 0.000     | 1.000   |
| Scrubland                                                           | -0.547   | 0.270  | -2.023    | 0.043   | Scrubland                                                        | -0.465   | 0.303 | -1.536    | 0.125   |
| Forest                                                              | -0.419   | 0.265  | -1.580    | 0.114   | Forest                                                           | -0.405   | 0.301 | -1.348    | 0.178   |
| Shannon diversity Index -SDI                                        |          |        |           |         | Shannon diversity Index - SDI                                    |          |       |           |         |
| Generalized Linear model: glm(SDI~Environment, family="Gamma")      |          |        |           |         | Linear model: glm(SDI~Environment, family="Gamma")               |          |       |           |         |
|                                                                     | Estimate | SE     | Statistic | p-value |                                                                  | Estimate | SE    | Statistic | p-value |
| Grassland                                                           | 0.438    | 0.079  | 5.584     | 0.000   | Grassland                                                        | 0.427    | 0.075 | 5.710     | 0.000   |
| Chestnut                                                            | -0.015   | 0.109  | -0.140    | 0.891   | Chestnut                                                         | 0.036    | 0.110 | 0.323     | 0.752   |
| Scrubland                                                           | 0.260    | 0.148  | 1.763     | 0.103   | Scrubland                                                        | 0.194    | 0.132 | 1.466     | 0.168   |
| Forest                                                              | 0.151    | 0.131  | 1.145     | 0.274   | Forest                                                           | 0.127    | 0.123 | 1.034     | 0.321   |
| (ii) Functional diversity                                           |          |        |           |         |                                                                  |          |       |           |         |
| May                                                                 |          |        |           |         | June                                                             |          |       |           |         |
| Functional dispersion - Fdis                                        |          |        |           |         | Functional dispersion - Fdis                                     |          |       |           |         |
| Generalized Linear model: glm(Fdis~Environment, Family ="Gamma")    |          |        |           |         | Generalized Linear model: glm(Fdis~Environment, Family ="Gamma") |          |       |           |         |
|                                                                     | Estimate | SE     | Statistic | p-value |                                                                  | Estimate | SE    | Statistic | p-value |
| Grassland                                                           | 2.307    | 0.312  | 7.391     | 0.000   | Grassland                                                        | 2.901    | 0.409 | 7.085     | 0.000   |
| Chestnut                                                            | -0.096   | 0.432  | -0.222    | 0.828   | Chestnut                                                         | 0.215    | 0.601 | 0.358     | 0.726   |
| Scrubland                                                           | -0.115   | 0.431  | -0.267    | 0.794   | Scrubland                                                        | -1.322   | 0.466 | -2.837    | 0.015   |
| Forest                                                              | -0.407   | 0.404  | -1.007    | 0.334   | Forest                                                           | -1.608   | 0.448 | -3.587    | 0.004   |
| May                                                                 |          |        |           |         | June                                                             |          |       |           |         |
| Functional richness - Fric                                          |          |        |           |         | Functional richness - Fric                                       |          |       |           |         |
| Generalized Linear model: glm(Fric~Environment, Family ="Gamma")    |          |        |           |         | Generalized Linear model: glm(Fric~Environment, Family ="Gamma") |          |       |           |         |
|                                                                     | Estimate | SE     | Statistic | p-value |                                                                  | Estimate | SE    | Statistic | p-value |
| Grassland                                                           | 51.540   | 34.968 | 1.474     | 0.166   | Grassland                                                        | 8.583    | 2.880 | 2.980     | 0.011   |
| Chestnut                                                            | -15.289  | 42.751 | -0.358    | 0.727   | Chestnut                                                         | 5.100    | 5.420 | 0.941     | 0.365   |
| Scrubland                                                           | -43.663  | 35.374 | -1.234    | 0.241   | Scrubland                                                        | -6.118   | 2.997 | -2.041    | 0.064   |
| Forest                                                              | -41.116  | 35.676 | -1.152    | 0.272   | Forest                                                           | -6.224   | 2.987 | -2.084    | 0.059   |

| Functional divergence - Fdiv                                     |          |       |           |         |
|------------------------------------------------------------------|----------|-------|-----------|---------|
| Generalized Linear model: glm(Fdiv~Environment, Family ="Gamma") |          |       |           |         |
|                                                                  | Estimate | SE    | Statistic | p-value |
| Grassland                                                        | 1.134    | 0.052 | 21.705    | 0.000   |
| Chestnut                                                         | 0.068    | 0.076 | 0.888     | 0.392   |
| Scrubland                                                        | 0.027    | 0.075 | 0.359     | 0.726   |
| Forest                                                           | -0.016   | 0.073 | -0.216    | 0.833   |

| Functional evenness - Feve                                       |          |       |           |         |
|------------------------------------------------------------------|----------|-------|-----------|---------|
| Generalized Linear model: glm(Feve~Environment, Family ="Gamma") |          |       |           |         |
|                                                                  | Estimate | SE    | Statistic | p-value |
| Grassland                                                        | 2.069    | 0.144 | 14.404    | 0.000   |
| Chestnut                                                         | 0.195    | 0.213 | 0.914     | 0.379   |
| Scrubland                                                        | 0.061    | 0.206 | 0.297     | 0.772   |
| Forest                                                           | -0.382   | 0.185 | -2.060    | 0.062   |

| Functional specialization - Fspe                                 |          |       |           |         |
|------------------------------------------------------------------|----------|-------|-----------|---------|
| Generalized Linear model: glm(Fspe~Environment, Family ="Gamma") |          |       |           |         |
|                                                                  | Estimate | SE    | Statistic | p-value |
| Grassland                                                        | 3.252    | 0.258 | 12.582    | 0.000   |
| Chestnut                                                         | 0.076    | 0.370 | 0.205     | 0.841   |
| Scrubland                                                        | -1.603   | 0.290 | -5.530    | 0.000   |
| Forest                                                           | -1.505   | 0.293 | -5.131    | 0.000   |

| Functional originality - Fori                                    |          |       |           |         |
|------------------------------------------------------------------|----------|-------|-----------|---------|
| Generalized Linear model: glm(Fori~Environment, Family ="Gamma") |          |       |           |         |
|                                                                  | Estimate | SE    | Statistic | p-value |
| Grassland                                                        | 6.737    | 2.097 | 3.213     | 0.007   |
| Chestnut                                                         | 6.131    | 4.521 | 1.356     | 0.200   |
| Scrubland                                                        | -4.149   | 2.247 | -1.847    | 0.090   |
| Forest                                                           | 7.101    | 4.791 | 1.482     | 0.164   |

| Number of functional entities - Fnfe                             |          |       |           |         |
|------------------------------------------------------------------|----------|-------|-----------|---------|
| Generalized Linear model: glm(Fnfe~Environment, Family ="Gamma") |          |       |           |         |
|                                                                  | Estimate | SE    | Statistic | p-value |
| Grassland                                                        | 2.546    | 0.174 | 14.589    | 0.000   |
| Chestnut                                                         | 0.195    | 0.240 | 0.815     | 0.415   |
| Scrubland                                                        | -0.243   | 0.257 | -0.944    | 0.345   |
| Forest                                                           | -0.171   | 0.254 | -0.672    | 0.502   |

| Functional divergence - Fdiv                                     |          |       |           |         |
|------------------------------------------------------------------|----------|-------|-----------|---------|
| Generalized Linear model: glm(Fdiv~Environment, Family ="Gamma") |          |       |           |         |
|                                                                  | Estimate | SE    | Statistic | p-value |
| Grassland                                                        | 1.171    | 0.086 | 13.572    | 0.000   |
| Chestnut                                                         | 0.205    | 0.133 | 1.537     | 0.150   |
| Scrubland                                                        | -0.047   | 0.120 | -0.394    | 0.701   |
| Forest                                                           | -0.076   | 0.118 | -0.647    | 0.530   |

| Functional evenness -Feve                                        |          |       |           |         |
|------------------------------------------------------------------|----------|-------|-----------|---------|
| Generalized Linear model: glm(Feve~Environment, Family ="Gamma") |          |       |           |         |
|                                                                  | Estimate | SE    | Statistic | p-value |
| Grassland                                                        | 2.479    | 0.284 | 8.737     | 0.000   |
| Chestnut                                                         | 0.350    | 0.430 | 0.813     | 0.432   |
| Scrubland                                                        | -0.143   | 0.390 | -0.367    | 0.720   |
| Forest                                                           | -0.692   | 0.350 | -1.979    | 0.071   |

| Functional specialization -Fspe                                  |          |       |           |         |
|------------------------------------------------------------------|----------|-------|-----------|---------|
| Generalized Linear model: glm(Fspe~Environment, Family ="Gamma") |          |       |           |         |
|                                                                  | Estimate | SE    | Statistic | p-value |
| Grassland                                                        | 2.473    | 0.162 | 15.238    | 0.000   |
| Chestnut                                                         | 0.280    | 0.243 | 1.152     | 0.272   |
| Scrubland                                                        | -1.204   | 0.182 | -6.598    | 0.000   |
| Forest                                                           | -1.102   | 0.186 | -5.938    | 0.000   |

| Functional originality - Fori                                    |          |        |           |         |
|------------------------------------------------------------------|----------|--------|-----------|---------|
| Generalized Linear model: glm(Fori~Environment, Family ="Gamma") |          |        |           |         |
|                                                                  | Estimate | SE     | Statistic | p-value |
| Grassland                                                        | 9.505    | 3.573  | 2.660     | 0.021   |
| Chestnut                                                         | 15.542   | 10.071 | 1.543     | 0.149   |
| Scrubland                                                        | -5.542   | 3.872  | -1.431    | 0.178   |
| Forest                                                           | -2.372   | 4.468  | -0.531    | 0.605   |

| Number of functional entities - Fnfe                             |          |       |           |         |
|------------------------------------------------------------------|----------|-------|-----------|---------|
| Generalized Linear model: glm(Fnfe~Environment, Family ="Gamma") |          |       |           |         |
|                                                                  | Estimate | SE    | Statistic | p-value |
| Grassland                                                        | 2.603    | 0.205 | 12.684    | 0.000   |
| Chestnut                                                         | -0.139   | 0.295 | -0.471    | 0.638   |
| Scrubland                                                        | -0.275   | 0.300 | -0.918    | 0.359   |
| Forest                                                           | -0.160   | 0.296 | -0.542    | 0.588   |

| Functional Redundancy - Fred                                     |          |       |           |         |
|------------------------------------------------------------------|----------|-------|-----------|---------|
| Generalized Linear model: glm(Fred~Environment, Family ="Gamma") |          |       |           |         |
|                                                                  | Estimate | SE    | Statistic | p-value |
| Grassland                                                        | 0.668    | 0.027 | 24.317    | 0.000   |
| Chestnut                                                         | 0.036    | 0.040 | 0.900     | 0.386   |
| Scrubland                                                        | 0.271    | 0.047 | 5.717     | 0.000   |
| Forest                                                           | 0.207    | 0.045 | 4.574     | 0.001   |

| Functional Vulnerability - Fvuln                                  |          |       |           |         |
|-------------------------------------------------------------------|----------|-------|-----------|---------|
| Generalized Linear model: glm(Fvuln~Environment, Family ="Gamma") |          |       |           |         |
|                                                                   | Estimate | SE    | Statistic | p-value |
| Grassland                                                         | 1.153    | 0.041 | 28.074    | 0.000   |
| Chestnut                                                          | 0.111    | 0.061 | 1.820     | 0.094   |
| Scrubland                                                         | -0.099   | 0.056 | -1.779    | 0.101   |
| Forest                                                            | -0.053   | 0.057 | -0.938    | 0.367   |

| Functional Redundancy - Fred                                     |          |       |           |         |
|------------------------------------------------------------------|----------|-------|-----------|---------|
| Generalized Linear model: glm(Fred~Environment, Family ="Gamma") |          |       |           |         |
|                                                                  | Estimate | SE    | Statistic | p-value |
| Grassland                                                        | 0.705    | 0.059 | 11.982    | 0.000   |
| Chestnut                                                         | -0.123   | 0.076 | -1.614    | 0.132   |
| Scrubland                                                        | 0.108    | 0.090 | 1.200     | 0.253   |
| Forest                                                           | 0.174    | 0.094 | 1.850     | 0.089   |

| Functional Vulnerability - Fvuln                                  |          |       |           |         |
|-------------------------------------------------------------------|----------|-------|-----------|---------|
| Generalized Linear model: glm(Fvuln~Environment, Family ="Gamma") |          |       |           |         |
|                                                                   | Estimate | SE    | Statistic | p-value |
| Grassland                                                         | 1.158    | 0.063 | 18.436    | 0.000   |
| Chestnut                                                          | 0.113    | 0.093 | 1.213     | 0.248   |
| Scrubland                                                         | 0.044    | 0.091 | 0.483     | 0.637   |
| Forest                                                            | -0.038   | 0.087 | -0.432    | 0.674   |
